# Supplementary material
Source: publisher figshare collection journal article supplement (https://sage.figshare.com/ndownloader/files/17534900)
Supplement: Supplementary file 1 [file 17534900]

**1 SUPPLEMENTARY FIGURE LEGENDS**

2

3

4

5

6

7

8

9

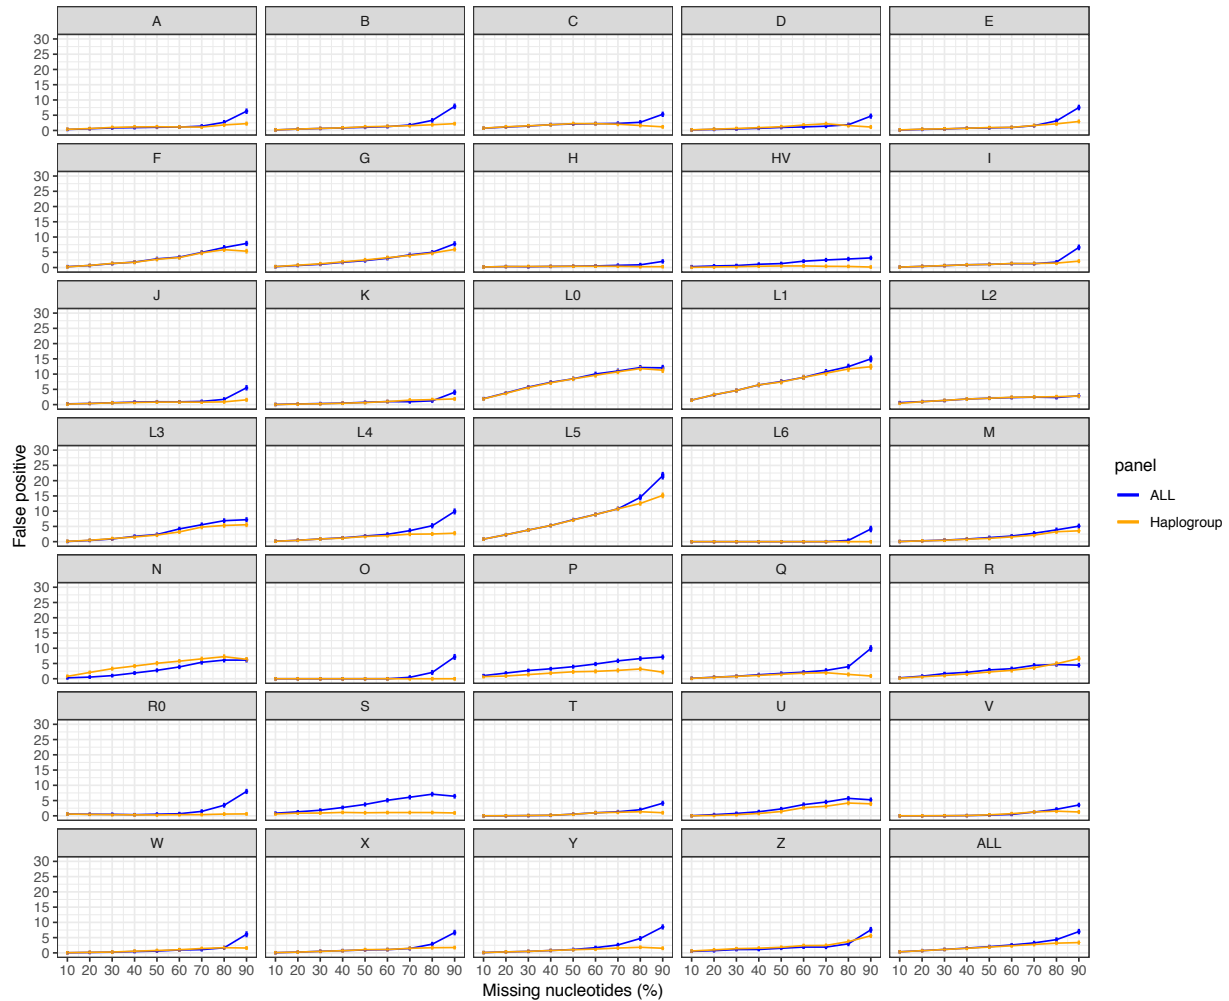

1

## 2 **Figure S1. The impact of the loss of genome coverage on false positives.**

3 The vertical axis shows the false positive rate, which is the number of erroneously inferred  
 4 nucleotides. The horizontal axis indicates the percentage of missing nucleotides (10%–90%) in the  
 5 partial mitochondrial genome sequences. Error bars indicate the standard error of the mean (SEM).  
 6 The results in the case of the “ALL” panel including all macro-haplogroup lineages are indicated  
 7 by the blue line, and those of the “Haplogroup” panel consisting of the same macro-haplogroup  
 8 lineages are indicated by the orange line.

9

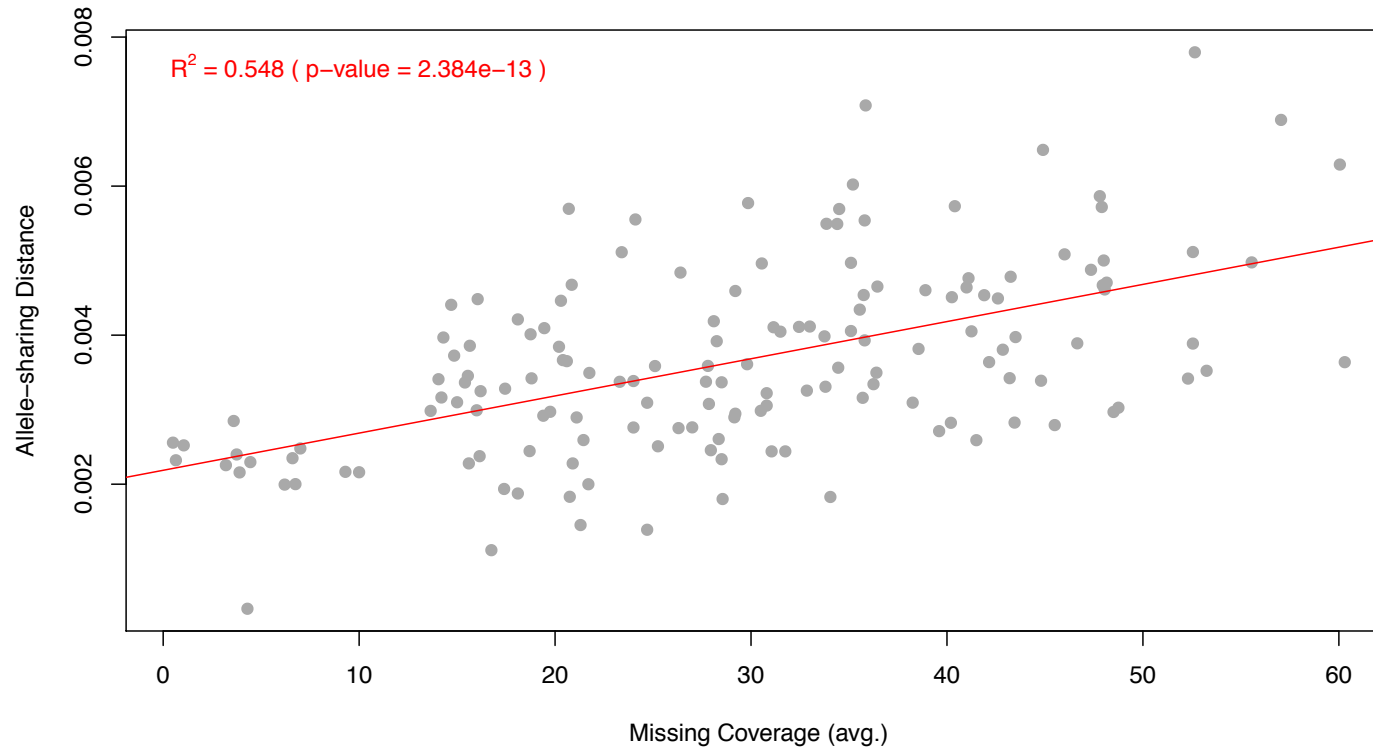

1

2 **Figure S2. Scatter plot between the pairwise allele-sharing distance and the missing mitochondrial genome coverage.**

3 This figure shows the correlation between the pairwise allele-sharing distances and the loss of mitochondrial genome coverage for the  
 4 partial human mitochondrial genome sequences from Lipson et al. (2018). Pearson's correlation test was performed in R ( $R^2 = 0.548$ ,  
 5  $p\text{-value} = 2.384e-13$ ).
